# Supplementary material
Source: publisher figshare collection journal article supplement (https://gsajournals.figshare.com/ndownloader/files/13507259)
Supplement: Supplementary file 1 [file 13507259]

**Table S1. Strains used in this study.**

| **Strain** | **Genotype** |
| --- | --- |
| ARF321 | *aaaEx78 [FBN-1::mCherry]* |
| CHB13 | *dex-1(ns42) III; oyIs44 V* |
| CHB81 | *fbn-1(ns283) III* |
| ML2482 | *noah-1(mc68 [noah-1::mCherry]) I* |
| ML2565 | *noah-2(mc93 [noah-2::GFP]) IV* |
| NES62 | *cbcEx1 [dex-1pro(5.7kb)::GFP; unc-122pro::GFP]* |
| OS2336 | *nsEx1339 [dex-1pro(2.1kb):his-24-mCherry; pRF4]* |
| OS2438 | *zuIs178 [his-72pro::HIS-72::GFP; unc-119(ed3)]; stIs10029 [pie-1pro::H2B::GFP];*  *nsEx1404 [dex-1pro(5.7kb):his-24-mCherry; pRF4]* |
| OS3652 | *nsEx2095 [dex-1pro(2.1kb):dex-1cDNA-mCherry; pRF4]* |
| UP2214 | *unc-119 (ed3) III; jcIs1 IV; qnEx59 [dct-5pro::mCherry]* |
| UP2417 | *dex-1(cs201)/qC1 [dpy-19(e1259) glp-1 (q339)] III* |
| UP2497 | *dex-1(ns42) III; jcIs1 IV; qnEx59* |
| UP2505 | *dex-1(ns42)/hT2g III; jcIs1 IV; dyf-7(ns117) X* |
| UP2566 | *saIs14 II; nsEx1339 [dex-1pro(2.1kb):his-24-mCherry; pRF4]* |
| UP2571 | *dex-1(cs201) III; csEx402 [dex-1pro(2.1kb)::DEX-1; unc-119pro::GFP]* |
| UP2597 | *dex-1(cs201) III; jcIs1 [AJM-1::GFP] IV; qnEx59 [dct-5pro::mCherry]; csEx402* |
| UP2605 | *dex-1(cs201) III; jcIs1 [AJM-1::GFP] IV; csEx402* |
| UP2609 | *dex-1(ns42) III* |
| UP2620 | *dex-1(cs201) III; lin-15(n765) X; zwEx113 [inx-13pro::GFP; lin-15+]* |
| UP2642 | *jcIs1 [AJM-1::GFP] IV; dyf-7(ns119) X; qnEx59 [dct-5pro::mCherry]* |
| UP2649 | *hmnEx144 [dyf-7pro::DYF-7-SfGFP]; qnEx59 [dct-5pro::mCherry]* |
| UP2656 | *dex-1(cs201) III; csEx412 [RDY-2::GFP; lin-48pro::mRFP]; csEx402* |
| UP2693 | *mcIs46 [DLG-1::RFP; unc-119+]; hmnEx144 [dyf-7pro::DYF-7-SfGFP]* |
| UP2838 | *csIs61 [RDY-2::GFP; lin-48pro::mRFP] I; dex-1(cs201) III; csEx402* |
| UP2851 | *csEx530 [pJC15=dex-1pro(2.1kb)::DEX-1(ecto)::SfGFP; lin-48pro::mRFP]* |
| UP3049 | *csEx444 [let-653pro::LET-653::SfGFP; lin-48pro::mRFP]; aaaEx78 [FBN-1::mCherry; ttx-3pro::GFP]* |
| UP3245 | *dex-1(cs201) III; csEx530 [pJC15 = dex-1pro(2.1kb)::DEX-1(ecto)::SfGFP; lin-48pro::mRFP]* |
| UP3414 | *csEx808 [pJC24=dex-1pro(2.1kb)::SfGFP-DEX-1; lin-48pro::mRFP]* |
| UP3422 | *csIs66 [let-653pro::ssSfGFP::LET-653(ZP); lin-48pro::mRFP] X* |
| UP3714 | *dex-1(cs201) III; csIs66 [let-653pro::ssSfGFP::LET-653(ZP); lin-48pro::mRFP] X; csEx402* |
| UP3753 | *dex-1(cs201) III; csEx808 [pJC24=dex-1pro(2.1kb)::SfGFP::DEX-1; lin-48pro::mRFP]* |
| ZW293 | *lin-15(n765) X; zwEx113 [inx-13pro::GFP; lin-15+]* |
